# Supplementary material for: Mollusc Crystallins: Physical and Chemical Properties and Phylogenetic Analysis
Source: MDPI journal article supplement (doi:10.3390/d14100827), 2022-10-01
Supplement: s1 [file s1]

Archive with 3 entries (3 files):
- Figure S1.pdf
- Table S1.pdf
- Table S2.pdf
