# Supplementary material for: Mollusc Crystallins: Physical and Chemical Properties and Phylogenetic Analysis
Source: MDPI journal article supplement (doi:10.3390/d14100827), 2022-10-01
Supplement: s1 [file s1 › Figure S1.pdf]

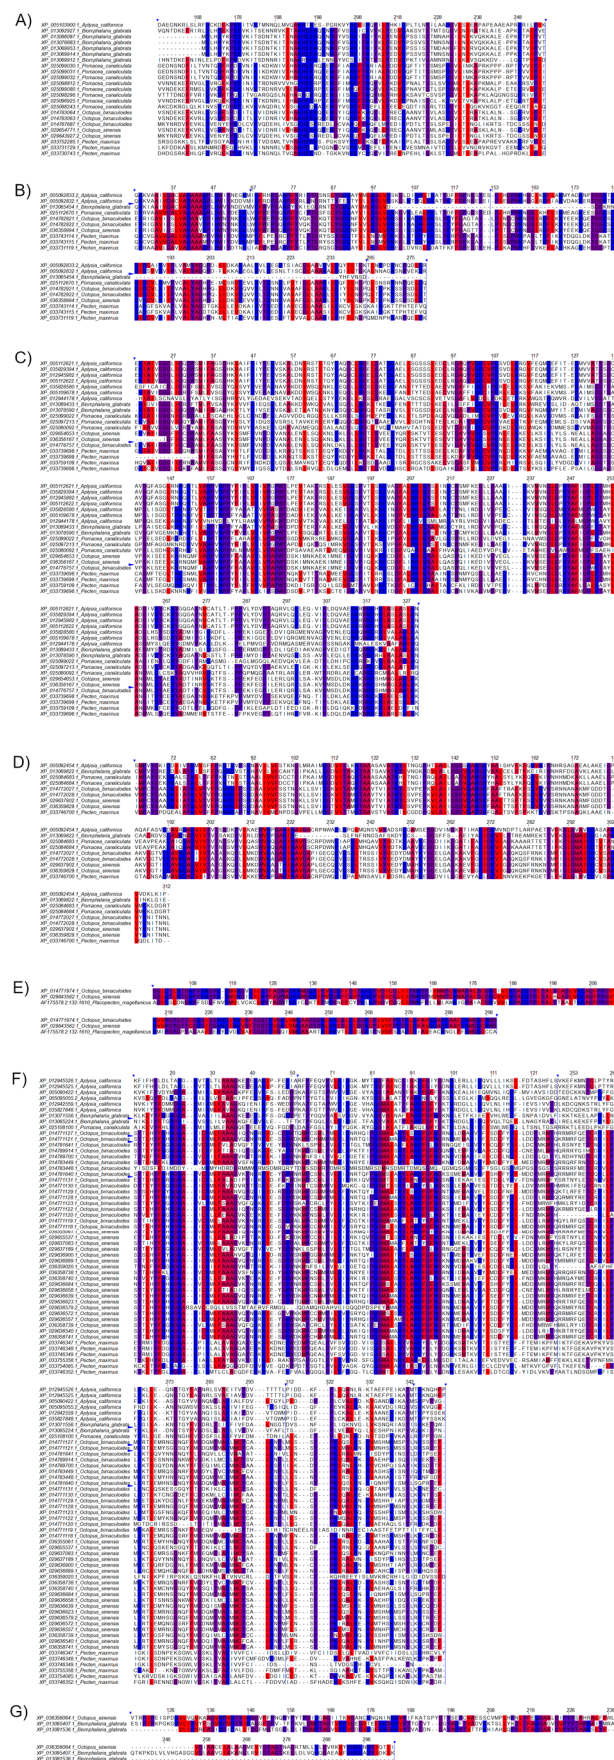

**Figure S1.** Alignment of amino acid sequences of molluscan crystallins. The most conserved regions for each crystalline family are presented: a)  $\alpha$ -crystallins, the region from 159 to 255 alignment position is shown; (b) J1A-crystallins, the regions from 28 to 56, 67 to 126, 153 to 242, 265 to 278 alignment positions are shown; (c)  $\lambda$ -crystallins, the region from 18 to 329 alignment position is shown; (d)  $\mu$ -crystallins, the region from 63 to 313 alignment position is shown; (e)  $\Omega$ -crystallines, shown section from 99 to 300 alignment position; (f) S-crystallines, the regions from 11 to 51, 63 to 127, 250 to 302, 312 to 343 and 451 to 458 alignment positions are shown; (g)  $\zeta$ -crystallines, the region from 119 to 305 alignment position is shown. Multiple sequence alignments were performed by the Clustal Omega algorithm and improved by the MUSCLE algorithm. Amino acid residues with >60% identity were highlighted in color. The most hydrophobic residues are colored red and the most hydrophilic residues are colored blue according to the amino acid hydrophobicity table [1]. The sign ▼ above the sequences indicates the excised regions. The single-letter amino acid designations correspond to the commonly used ones.

## References

1. Kyte, J.; Doolittle, R.F. A simple method for displaying the hydropathic character of a protein. *J Mol Biol* **1982**, *157*, 105–132, doi: 10.1016/0022-2836(82)90515-0.
