# Supplementary material for: Mollusc Crystallins: Physical and Chemical Properties and Phylogenetic Analysis
Source: MDPI journal article supplement (doi:10.3390/d14100827), 2022-10-01
Supplement: s1 [file s1 › Table S1.pdf]

**Table S1.** Crystallin amino acid sequences

1

| Class           | Species Name                                                  | Crystallin                                       | GenBank Accession No. |
|-----------------|---------------------------------------------------------------|--------------------------------------------------|-----------------------|
| <i>Mollusca</i> |                                                               |                                                  |                       |
| Cephalopoda     | <i>Octopus bimaculoides</i> (Pickford and McConnaughey, 1949) | Alpha-crystallin A chain-like isoform X1         | XP_014783063.1        |
| Cephalopoda     | <i>Octopus bimaculoides</i> (Pickford and McConnaughey, 1949) | Alpha-crystallin A chain-like isoform X2         | XP_014783064.1        |
| Cephalopoda     | <i>Octopus bimaculoides</i> (Pickford and McConnaughey, 1949) | Alpha-crystallin A chain-like                    | XP_014767687.1        |
| Cephalopoda     | <i>Octopus sinensis</i> (Cuvier, 1797)                        | Alpha-crystallin A chain isoform X1              | XP_029654771.1        |
| Cephalopoda     | <i>Octopus sinensis</i> (Cuvier, 1797)                        | Alpha-crystallin A chain-like                    | XP_029643927.2        |
| Cephalopoda     | <i>Octopus bimaculoides</i> (Pickford and McConnaughey, 1949) | Crystallin J1A-like                              | XP_014782921.1        |
| Cephalopoda     | <i>Octopus bimaculoides</i> (Pickford and McConnaughey, 1949) | Crystallin J1A-like                              | XP_014782922.1        |
| Cephalopoda     | <i>Octopus sinensis</i> (Cuvier, 1797)                        | Crystallin J1A                                   | XP_036358994.1        |
| Cephalopoda     | <i>Octopus sinensis</i> (Cuvier, 1797)                        | Lambda-crystallin isoform X1                     | XP_029654653.1        |
| Cephalopoda     | <i>Octopus sinensis</i> (Cuvier, 1797)                        | Lambda-crystallin isoform X2                     | XP_036356167.1        |
| Cephalopoda     | <i>Octopus sinensis</i> (Cuvier, 1797)                        | Lambda-crystallin isoform X3                     | XP_036356168.1        |
| Cephalopoda     | <i>Octopus bimaculoides</i> (Pickford and McConnaughey, 1949) | Lambda-crystallin-like                           | XP_014776757.1        |
| Cephalopoda     | <i>Octopus bimaculoides</i> (Pickford and McConnaughey, 1949) | Ketimine reductase mu-crystallin-like isoform X1 | XP_014772027.1        |
| Cephalopoda     | <i>Octopus bimaculoides</i> (Pickford and McConnaughey, 1949) | Ketimine reductase mu-crystallin-like isoform X2 | XP_014772028.1        |
| Cephalopoda     | <i>Octopus sinensis</i> (Cuvier, 1797)                        | Ketimine reductase mu-crystallin isoform X1      | XP_029637902.1        |
| Cephalopoda     | <i>Octopus sinensis</i> (Cuvier, 1797)                        | Ketimine reductase mu-crystallin isoform X2      | XP_036359829.1        |
| Cephalopoda     | <i>Octopus bimaculoides</i> (Pickford and McConnaughey, 1949) | Omega-crystallin                                 | XP_014771974.1        |
| Cephalopoda     | <i>Octopus sinensis</i> (Cuvier, 1797)                        | Omega-crystallin                                 | XP_029643562.1        |
| Cephalopoda     | <i>Octopus bimaculoides</i> (Pickford and McConnaughey, 1949) | S-crystallin 3 isoform X1                        | XP_014771126.1        |
| Cephalopoda     | <i>Octopus bimaculoides</i> (Pickford and McConnaughey, 1949) | S-crystallin 3 isoform X2                        | XP_014771127.1        |
| Cephalopoda     | <i>Octopus bimaculoides</i> (Pickford and McConnaughey, 1949) | S-crystallin 3                                   | XP_014771121.1        |
| Cephalopoda     | <i>Octopus bimaculoides</i> (Pickford and McConnaughey, 1949) | S-crystallin 4-like isoform X1                   | XP_014781641.1        |
| Cephalopoda     | <i>Octopus bimaculoides</i> (Pickford and McConnaughey, 1949) | S-crystallin 4-like isoform X2                   | XP_014781642.1        |
| Cephalopoda     | <i>Octopus bimaculoides</i> (Pickford and McConnaughey, 1949) | S-crystallin SL11-like                           | XP_014789914.1        |
| Cephalopoda     | <i>Octopus bimaculoides</i> (Pickford and McConnaughey, 1949) | S-crystallin SL11-like                           | XP_014789700.1        |
| Cephalopoda     | <i>Octopus bimaculoides</i> (Pickford and McConnaughey, 1949) | S-crystallin 2-like                              | XP_014783449.1        |

|             |                                                               |                                |                |
|-------------|---------------------------------------------------------------|--------------------------------|----------------|
| Cephalopoda | <i>Octopus bimaculoides</i> (Pickford and McConnaughey, 1949) | S-crystallin 2-like            | XP_014783448.1 |
| Cephalopoda | <i>Octopus bimaculoides</i> (Pickford and McConnaughey, 1949) | S-crystallin 3-like            | XP_014781640.1 |
| Cephalopoda | <i>Octopus bimaculoides</i> (Pickford and McConnaughey, 1949) | S-crystallin 4-like            | XP_014772690.1 |
| Cephalopoda | <i>Octopus bimaculoides</i> (Pickford and McConnaughey, 1949) | S-crystallin 4-like            | XP_014771131.1 |
| Cephalopoda | <i>Octopus bimaculoides</i> (Pickford and McConnaughey, 1949) | S-crystallin 4-like            | XP_014771130.1 |
| Cephalopoda | <i>Octopus bimaculoides</i> (Pickford and McConnaughey, 1949) | S-crystallin 3-like            | XP_014771129.1 |
| Cephalopoda | <i>Octopus bimaculoides</i> (Pickford and McConnaughey, 1949) | S-crystallin 3-like            | XP_014771128.1 |
| Cephalopoda | <i>Octopus bimaculoides</i> (Pickford and McConnaughey, 1949) | S-crystallin SL20-1-like       | XP_014771123.1 |
| Cephalopoda | <i>Octopus bimaculoides</i> (Pickford and McConnaughey, 1949) | S-crystallin 2                 | XP_014771122.1 |
| Cephalopoda | <i>Octopus bimaculoides</i> (Pickford and McConnaughey, 1949) | S-crystallin 4-like            | XP_014771120.1 |
| Cephalopoda | <i>Octopus bimaculoides</i> (Pickford and McConnaughey, 1949) | S-crystallin 4-like            | XP_014771119.1 |
| Cephalopoda | <i>Octopus bimaculoides</i> (Pickford and McConnaughey, 1949) | S-crystallin 3-like            | XP_014771118.1 |
| Cephalopoda | <i>Octopus sinensis</i> (Cuvier, 1797)                        | S-crystallin 2-like            | XP_036355061.1 |
| Cephalopoda | <i>Octopus sinensis</i> (Cuvier, 1797)                        | S-crystallin 4-like            | XP_029655537.1 |
| Cephalopoda | <i>Octopus sinensis</i> (Cuvier, 1797)                        | S-crystallin 4-like            | XP_029637189.1 |
| Cephalopoda | <i>Octopus sinensis</i> (Cuvier, 1797)                        | S-crystallin 4-like            | XP_029637083.1 |
| Cephalopoda | <i>Octopus sinensis</i> (Cuvier, 1797)                        | S-crystallin 3-like            | XP_029636900.1 |
| Cephalopoda | <i>Octopus sinensis</i> (Cuvier, 1797)                        | S-crystallin SL18              | XP_029636899.1 |
| Cephalopoda | <i>Octopus sinensis</i> (Cuvier, 1797)                        | S-crystallin 3-like            | XP_036359020.1 |
| Cephalopoda | <i>Octopus sinensis</i> (Cuvier, 1797)                        | S-crystallin 2-like            | XP_036358738.1 |
| Cephalopoda | <i>Octopus sinensis</i> (Cuvier, 1797)                        | S-crystallin 4-like            | XP_036358740.1 |
| Cephalopoda | <i>Octopus sinensis</i> (Cuvier, 1797)                        | S-crystallin 3-like            | XP_029636684.1 |
| Cephalopoda | <i>Octopus sinensis</i> (Cuvier, 1797)                        | S-crystallin SL11-like         | XP_029636658.1 |
| Cephalopoda | <i>Octopus sinensis</i> (Cuvier, 1797)                        | S-crystallin 3-like            | XP_029636639.1 |
| Cephalopoda | <i>Octopus sinensis</i> (Cuvier, 1797)                        | S-crystallin 3                 | XP_029636623.1 |
| Cephalopoda | <i>Octopus sinensis</i> (Cuvier, 1797)                        | S-crystallin 1                 | XP_029636579.2 |
| Cephalopoda | <i>Octopus sinensis</i> (Cuvier, 1797)                        | S-crystallin 3-like            | XP_029636572.1 |
| Cephalopoda | <i>Octopus sinensis</i> (Cuvier, 1797)                        | S-crystallin 3-like            | XP_029636557.1 |
| Cephalopoda | <i>Octopus sinensis</i> (Cuvier, 1797)                        | S-crystallin SL20-1-like       | XP_036358739.1 |
| Cephalopoda | <i>Octopus sinensis</i> (Cuvier, 1797)                        | S-crystallin 4                 | XP_029636540.1 |
| Cephalopoda | <i>Octopus sinensis</i> (Cuvier, 1797)                        | S-crystallin 3                 | XP_036358741.1 |
| Cephalopoda | <i>Octopus sinensis</i> (Cuvier, 1797)                        | Zeta-crystallin-like           | XP_036356064.1 |
| Bivalvia    | <i>Pecten maximus</i> (Linnaeus, 1758)                        | Alpha-crystallin A chain-like  | XP_033752285.1 |
| Bivalvia    | <i>Pecten maximus</i> (Linnaeus, 1758)                        | Alpha-crystallin A chain-like  | XP_033731729.1 |
| Bivalvia    | <i>Pecten maximus</i> (Linnaeus, 1758)                        | Alpha-crystallin B chain-like  | XP_033730743.1 |
| Bivalvia    | <i>Pecten maximus</i> (Linnaeus, 1758)                        | Beta-crystallin A3-like        | XP_033724714.1 |
| Bivalvia    | <i>Pecten maximus</i> (Linnaeus, 1758)                        | Crystallin J1A-like isoform X1 | XP_033743114.1 |
| Bivalvia    | <i>Pecten maximus</i> (Linnaeus, 1758)                        | Crystallin J1A-like isoform X2 | XP_033743115.1 |
| Bivalvia    | <i>Pecten maximus</i> (Linnaeus, 1758)                        | Crystallin J1A-like            | XP_033731119.1 |

|                   |                                                 |                                                  |                     |
|-------------------|-------------------------------------------------|--------------------------------------------------|---------------------|
| <i>Bivalvia</i>   | <i>Pecten maximus</i> (Linnaeus, 1758)          | Lambda-crystallin homolog isoform X1             | XP_033739698.1      |
| <i>Bivalvia</i>   | <i>Pecten maximus</i> (Linnaeus, 1758)          | Lambda-crystallin homolog isoform X2             | XP_033739699.1      |
| <i>Bivalvia</i>   | <i>Pecten maximus</i> (Linnaeus, 1758)          | Lambda-crystallin homolog                        | XP_033759109.1      |
| <i>Bivalvia</i>   | <i>Pecten maximus</i> (Linnaeus, 1758)          | Lambda-crystallin-like                           | XP_033739696.1      |
| <i>Bivalvia</i>   | <i>Pecten maximus</i> (Linnaeus, 1758)          | Ketimine reductase mu-crystallin-like            | XP_033746700.1      |
| <i>Bivalvia</i>   | <i>Pecten maximus</i> (Linnaeus, 1758)          | S-crystallin SL11-like isoform X1                | XP_033746347.1      |
| <i>Bivalvia</i>   | <i>Pecten maximus</i> (Linnaeus, 1758)          | S-crystallin SL11-like isoform X2                | XP_033746348.1      |
| <i>Bivalvia</i>   | <i>Pecten maximus</i> (Linnaeus, 1758)          | S-crystallin SL11-like isoform X3                | XP_033746349.1      |
| <i>Bivalvia</i>   | <i>Pecten maximus</i> (Linnaeus, 1758)          | S-crystallin SL11-like                           | XP_033755358.1      |
| <i>Bivalvia</i>   | <i>Pecten maximus</i> (Linnaeus, 1758)          | S-crystallin SL11-like                           | XP_033754085.1      |
| <i>Bivalvia</i>   | <i>Pecten maximus</i> (Linnaeus, 1758)          | S-crystallin SL11-like                           | XP_033746352.1      |
| <i>Bivalvia</i>   | <i>Placopecten magellanicus</i> (Gmelin, 1791)  | Omega-crystallin                                 | AF175578.2:132-1610 |
| <i>Gastropoda</i> | <i>Aplysia californica</i> (J. G. Cooper, 1863) | Alpha-crystallin B chain                         | XP_005103900.1      |
| <i>Gastropoda</i> | <i>Biomphalaria glabrata</i> (Say, 1818)        | Alpha-crystallin B chain-like                    | XP_013092927.1      |
| <i>Gastropoda</i> | <i>Biomphalaria glabrata</i> (Say, 1818)        | Alpha-crystallin B chain-like                    | XP_013086097.1      |
| <i>Gastropoda</i> | <i>Biomphalaria glabrata</i> (Say, 1818)        | Alpha-crystallin B chain-like                    | XP_013076883.1      |
| <i>Gastropoda</i> | <i>Biomphalaria glabrata</i> (Say, 1818)        | Alpha-crystallin B chain-like                    | XP_013069953.1      |
| <i>Gastropoda</i> | <i>Biomphalaria glabrata</i> (Say, 1818)        | Alpha-crystallin B chain-like                    | XP_013069914.1      |
| <i>Gastropoda</i> | <i>Biomphalaria glabrata</i> (Say, 1818)        | Alpha-crystallin B chain-like                    | XP_013069912.1      |
| <i>Gastropoda</i> | <i>Pomacea canaliculata</i> (Lamarck, 1819)     | Alpha-crystallin B chain-like isoform X1         | XP_025099030.1      |
| <i>Gastropoda</i> | <i>Pomacea canaliculata</i> (Lamarck, 1819)     | Alpha-crystallin B chain-like isoform X2         | XP_025099031.1      |
| <i>Gastropoda</i> | <i>Pomacea canaliculata</i> (Lamarck, 1819)     | Alpha-crystallin B chain-like isoform X3         | XP_025099032.1      |
| <i>Gastropoda</i> | <i>Pomacea canaliculata</i> (Lamarck, 1819)     | Alpha-crystallin B chain-like                    | XP_025098812.1      |
| <i>Gastropoda</i> | <i>Pomacea canaliculata</i> (Lamarck, 1819)     | Alpha-crystallin A chain-like                    | XP_025099080.1      |
| <i>Gastropoda</i> | <i>Pomacea canaliculata</i> (Lamarck, 1819)     | Alpha-crystallin A chain-like                    | XP_025098296.1      |
| <i>Gastropoda</i> | <i>Pomacea canaliculata</i> (Lamarck, 1819)     | Alpha-crystallin B chain-like                    | XP_025096925.1      |
| <i>Gastropoda</i> | <i>Pomacea canaliculata</i> (Lamarck, 1819)     | Alpha-crystallin A chain-like                    | XP_025088243.1      |
| <i>Gastropoda</i> | <i>Aplysia californica</i> (J. G. Cooper, 1863) | Crystallin J1A                                   | XP_005092833.2      |
| <i>Gastropoda</i> | <i>Aplysia californica</i> (J. G. Cooper, 1863) | Crystallin J1C                                   | XP_005092832.1      |
| <i>Gastropoda</i> | <i>Biomphalaria glabrata</i> (Say, 1818)        | Crystallin J1A-like                              | XP_013065813.1      |
| <i>Gastropoda</i> | <i>Biomphalaria glabrata</i> (Say, 1818)        | Crystallin J1A-like                              | XP_013065454.1      |
| <i>Gastropoda</i> | <i>Pomacea canaliculata</i> (Lamarck, 1819)     | Crystallin J1A-like                              | XP_025112670.1      |
| <i>Gastropoda</i> | <i>Aplysia californica</i> (J. G. Cooper, 1863) | Lambda-crystallin homolog                        | XP_005112621.1      |
| <i>Gastropoda</i> | <i>Aplysia californica</i> (J. G. Cooper, 1863) | Lambda-crystallin homolog                        | XP_035829394.1      |
| <i>Gastropoda</i> | <i>Aplysia californica</i> (J. G. Cooper, 1863) | Lambda-crystallin homolog                        | XP_012945982.1      |
| <i>Gastropoda</i> | <i>Aplysia californica</i> (J. G. Cooper, 1863) | Lambda-crystallin homolog                        | XP_005112622.1      |
| <i>Gastropoda</i> | <i>Aplysia californica</i> (J. G. Cooper, 1863) | Lambda-crystallin isoform X1                     | XP_035828580.1      |
| <i>Gastropoda</i> | <i>Aplysia californica</i> (J. G. Cooper, 1863) | Lambda-crystallin homolog isoform X2             | XP_005109678.1      |
| <i>Gastropoda</i> | <i>Aplysia californica</i> (J. G. Cooper, 1863) | Lambda-crystallin                                | XP_012944178.1      |
| <i>Gastropoda</i> | <i>Biomphalaria glabrata</i> (Say, 1818)        | Lambda-crystallin homolog                        | XP_013089433.1      |
| <i>Gastropoda</i> | <i>Biomphalaria glabrata</i> (Say, 1818)        | Lambda-crystallin homolog                        | XP_013078590.1      |
| <i>Gastropoda</i> | <i>Pomacea canaliculata</i> (Lamarck, 1819)     | Lambda-crystallin-like                           | XP_025099022.1      |
| <i>Gastropoda</i> | <i>Pomacea canaliculata</i> (Lamarck, 1819)     | Lambda-crystallin homolog                        | XP_025097213.1      |
| <i>Gastropoda</i> | <i>Pomacea canaliculata</i> (Lamarck, 1819)     | Lambda-crystallin homolog                        | XP_025080092.1      |
| <i>Gastropoda</i> | <i>Aplysia californica</i> (J. G. Cooper, 1863) | Ketimine reductase mu-crystallin                 | XP_005092454.1      |
| <i>Gastropoda</i> | <i>Biomphalaria glabrata</i> (Say, 1818)        | Ketimine reductase mu-crystallin-like            | XP_013069822.1      |
| <i>Gastropoda</i> | <i>Pomacea canaliculata</i> (Lamarck, 1819)     | Ketimine reductase mu-crystallin-like isoform X1 | XP_025084683.1      |
| <i>Gastropoda</i> | <i>Pomacea canaliculata</i> (Lamarck, 1819)     | Ketimine reductase mu-crystallin-like isoform X2 | XP_025084684.1      |

|                       |                                                 |                               |                |
|-----------------------|-------------------------------------------------|-------------------------------|----------------|
| <i>Gastropoda</i>     | <i>Aplysia californica</i> (J. G. Cooper, 1863) | S-crystallin SL11 isoform X1  | XP_012945525.1 |
| <i>Gastropoda</i>     | <i>Aplysia californica</i> (J. G. Cooper, 1863) | S-crystallin SL11 isoform X2  | XP_012945526.1 |
| <i>Gastropoda</i>     | <i>Aplysia californica</i> (J. G. Cooper, 1863) | S-crystallin SL11             | XP_005090422.1 |
| <i>Gastropoda</i>     | <i>Aplysia californica</i> (J. G. Cooper, 1863) | S-crystallin SL11             | XP_005095055.2 |
| <i>Gastropoda</i>     | <i>Aplysia californica</i> (J. G. Cooper, 1863) | S-crystallin SL11-like        | XP_012942559.1 |
| <i>Gastropoda</i>     | <i>Aplysia californica</i> (J. G. Cooper, 1863) | S-crystallin SL11-like        | XP_035827848.1 |
| <i>Gastropoda</i>     | <i>Biomphalaria glabrata</i> (Say, 1818)        | S-crystallin SL20-1-like      | XP_013071556.1 |
| <i>Gastropoda</i>     | <i>Biomphalaria glabrata</i> (Say, 1818)        | S-crystallin SL11-like        | XP_013066599.1 |
| <i>Gastropoda</i>     | <i>Biomphalaria glabrata</i> (Say, 1818)        | S-crystallin SL11-like        | XP_013065224.1 |
| <i>Gastropoda</i>     | <i>Pomacea canaliculata</i> (Lamarck, 1819)     | S-crystallin 4-like           | XP_025108100.1 |
| <i>Gastropoda</i>     | <i>Biomphalaria glabrata</i> (Say, 1818)        | Zeta-crystallin-like          | XP_013095407.1 |
| <i>Gastropoda</i>     | <i>Biomphalaria glabrata</i> (Say, 1818)        | Zeta-crystallin-like, partial | XP_013081536.1 |
| <b>Vertebrata</b>     |                                                 |                               |                |
| <i>Actinopterygii</i> | <i>Danio rerio</i> (Hamilton, 1822)             | Alpha-crystallin A chain      | NP_694482.1    |
| <i>Actinopterygii</i> | <i>Danio rerio</i> (Hamilton, 1822)             | Crystallin, alpha B, a        | NP_571232.1    |
| <i>Actinopterygii</i> | <i>Danio rerio</i> (Hamilton, 1822)             | Crystallin, alpha B, b        | NP_001002670.1 |
| <i>Actinopterygii</i> | <i>Danio rerio</i> (Hamilton, 1822)             | Selenoprotein J               | NP_001180398.1 |
| <i>Actinopterygii</i> | <i>Danio rerio</i> (Hamilton, 1822)             | Crystallin, gamma S1          | NP_001013294.1 |
| <i>Actinopterygii</i> | <i>Danio rerio</i> (Hamilton, 1822)             | Crystallin, gamma MX          | NP_001013280.1 |
| <i>Actinopterygii</i> | <i>Danio rerio</i> (Hamilton, 1822)             | Crystallin, gamma M2c         | NP_001007784.1 |
| <i>Actinopterygii</i> | <i>Danio rerio</i> (Hamilton, 1822)             | Gamma-crystallin N-A          | NP_001007785.1 |
| <i>Actinopterygii</i> | <i>Danio rerio</i> (Hamilton, 1822)             | Crystallin, gamma M1          | NP_001007786.1 |
| <b>Cnidaria</b>       |                                                 |                               |                |
| <i>Cubozoa</i>        | <i>Tripedalia cystophora</i> (Conant, 1897)     | J1A crystallin                | AAA30106.1     |
| <i>Cubozoa</i>        | <i>Tripedalia cystophora</i> (Conant, 1897)     | J1B crystallin                | AAA30107.1     |
| <i>Cubozoa</i>        | <i>Tripedalia cystophora</i> (Conant, 1897)     | J1C crystallin                | AAA30108.1     |
| <i>Cubozoa</i>        | <i>Tripedalia cystophora</i> (Conant, 1897)     | J2 crystallin                 | ABQ12778.1     |
