# Supplementary material for: Mollusc Crystallins: Physical and Chemical Properties and Phylogenetic Analysis
Source: MDPI journal article supplement (doi:10.3390/d14100827), 2022-10-01
Supplement: s1 [file s1 › Table S2.pdf]

**Table S2.** Analysis of multiple sequence alignment of crystallins and crystallin-like proteins of molluscs

| Crystallins                            | Number of analyzed sequences | The length of the analyzed sequences, in amino acid residues | Normalized conservation index by Mirny, Mean $\pm$ SD | Number of identical amino acids | Number of conservative substitutions                                                                            | Number of semi-conservative substitutions                                                                                                                          |
|----------------------------------------|------------------------------|--------------------------------------------------------------|-------------------------------------------------------|---------------------------------|-----------------------------------------------------------------------------------------------------------------|--------------------------------------------------------------------------------------------------------------------------------------------------------------------|
| <b><math>\alpha</math>-crystallins</b> | 23                           | Minimum: 87<br>Maximum: 233<br>Average: 156                  | 0.83 $\pm$ 0.26                                       | 2:<br>P214<br>L232              | 19:<br>D169 /<br>N / E<br>F173 / Y<br>E176 / D / Q<br>V178 / I / L<br>I180 / V / L<br>I187 / L / V              | 7:<br>I189 / V<br>L168 / M / V / F<br>E177 / D / N / H<br>A191 / G<br>E195 / S / Q<br>S224 / C / A<br>D229 / N / H / E<br>G230 / N                                 |
|                                        |                              |                                                              |                                                       |                                 | L213 / M / I<br>D218 / N / E<br>V222 / I / L /<br>M<br>L256 / M / V<br>I234 / M / V<br>I250 / V / L<br>I252 / V |                                                                                                                                                                    |
|                                        |                              |                                                              |                                                       |                                 | 30:<br>R29<br>A33<br>G36<br>V39<br>A40<br>D41<br>A42<br>A43<br>P46<br>H48<br>W49<br>Y51                         | 32:<br>L26 / V / I<br>V34 / I<br>V35 / I / L<br>A37 / S<br>L47 / I / V<br>L56 / M<br>L59 / I / V<br>I60 / L<br>E63 / D / Q /<br>N<br>S86 / T<br>D90 / E            |
|                                        |                              |                                                              |                                                       |                                 |                                                                                                                 | 20:<br>G32 / A<br>A44 / V<br>N52 / D / K<br>E64 / S / Q<br>T82 / N<br>N102 / S<br>K103 / S / E<br>K111 / T<br>K112 / D<br>E116 / D / k<br>P120 / A<br>D159 / H / E |
| <b>J1A-crystallins</b>                 | 19                           | Minimum: 298<br>Maximum: 333<br>Average: 320                 | 0.65 $\pm$ 0.29                                       |                                 |                                                                                                                 |                                                                                                                                                                    |
|                                        |                              |                                                              |                                                       |                                 |                                                                                                                 |                                                                                                                                                                    |
|                                        |                              |                                                              |                                                       |                                 |                                                                                                                 |                                                                                                                                                                    |
|                                        |                              |                                                              |                                                       |                                 |                                                                                                                 |                                                                                                                                                                    |
|                                        |                              |                                                              |                                                       |                                 |                                                                                                                 |                                                                                                                                                                    |
|                                        |                              |                                                              |                                                       |                                 |                                                                                                                 |                                                                                                                                                                    |
|                                        |                              |                                                              |                                                       |                                 |                                                                                                                 |                                                                                                                                                                    |
|                                        |                              |                                                              |                                                       |                                 |                                                                                                                 |                                                                                                                                                                    |
|                                        |                              |                                                              |                                                       |                                 |                                                                                                                 |                                                                                                                                                                    |
|                                        |                              |                                                              |                                                       |                                 |                                                                                                                 |                                                                                                                                                                    |
|                                        |                              |                                                              |                                                       |                                 |                                                                                                                 |                                                                                                                                                                    |
|                                        |                              |                                                              |                                                       |                                 |                                                                                                                 |                                                                                                                                                                    |
|                                        |                              |                                                              |                                                       |                                 |                                                                                                                 |                                                                                                                                                                    |

---

|  |      |                |                  |
|--|------|----------------|------------------|
|  | F69  | F93 / Y        | S173 / K         |
|  | S73  | V95 / L / I /  | H195 / Q / D     |
|  | P76  | M              | P196 / T         |
|  | F77  | K97 / N        | V203 / A         |
|  | Y78  | L99 / M        | E212 / N / S     |
|  | G83  | L105 / I / V   | N 213 / S / D    |
|  | Y88  | N106 / D       | A216 / T / S / P |
|  | Q91  | Y115 / F       | G220 / A         |
|  | V94  | S122 / T       | A224 / V         |
|  | L96  | E125 / D       | P250 / S / A     |
|  | S98  | L146 / M / I / | G254 / S         |
|  | V100 | F              | V269 / A         |
|  | E101 | I157 / L / V   | V281 / A         |
|  | G104 | L161 / I       | N288 / C         |
|  | F118 | Q169 / E / D   |                  |
|  | G119 | / N            |                  |
|  | Y124 | T171 / S       |                  |
|  | P147 | T175 / S       |                  |
|  | I148 | R184 / K       |                  |
|  | W152 | V185 / I / M   |                  |
|  | R153 | V188 / L       |                  |
|  | F160 | L191 / M       |                  |
|  | N163 | L199 / M / F   |                  |
|  | G172 | E204 / D       |                  |
|  | D176 | V207 / L / I   |                  |
|  | Q178 | V209 / L / I   |                  |
|  | D180 | D214 / N       |                  |
|  | P187 | V217 / I       |                  |
|  | A190 | I231 / V       |                  |
|  | Y192 | V240 / L / I   |                  |
|  | A193 | N249 / D       |                  |
|  | G194 | V262 / L / M   |                  |
|  | L200 | L266 / I       |                  |
|  | R208 | Q267 / R       |                  |
|  | Q211 |                |                  |
|  | L221 |                |                  |
|  | A223 |                |                  |
|  | L227 |                |                  |
|  | E228 |                |                  |
|  | L232 |                |                  |
|  | P266 |                |                  |
|  | V280 |                |                  |

---

|                      |    |                                              |           |                    |
|----------------------|----|----------------------------------------------|-----------|--------------------|
|                      |    |                                              |           | <b>52:</b>         |
|                      |    |                                              |           | L35 / I / V        |
|                      |    |                                              |           | F36 / Y            |
|                      |    |                                              |           | L45 / I / V /      |
|                      |    |                                              |           | M                  |
|                      |    |                                              |           | I60 / V / M /      |
|                      |    |                                              |           | <b>30:</b>         |
|                      |    |                                              |           | L                  |
|                      |    |                                              |           | V43 R74 / K        |
|                      |    |                                              |           | L64 I86 / V        |
|                      |    |                                              |           | G71 V96 / L / I    |
|                      |    |                                              |           | G75 A98 / S        |
|                      |    |                                              |           | P107 V102 / I      |
|                      |    |                                              |           | K113 E104 / D      |
|                      |    |                                              |           | V116 V 106 / I / L |
|                      |    |                                              |           | S134 E108 / D      |
|                      |    |                                              |           | S141 D121 / E      |
|                      |    |                                              |           | P161 I130 / V / L  |
|                      |    |                                              |           | E169 S133 / T      |
|                      |    |                                              |           | P172 S135 / T / A  |
|                      |    |                                              |           | W175 S136 / T      |
|                      |    |                                              |           | T176 L138 / I      |
|                      |    |                                              |           | G192 F143 / L / I  |
|                      |    |                                              |           | P195 L147 / M      |
|                      |    |                                              |           | E201 H149 / N      |
|                      |    |                                              |           | G204 K150 / R      |
|                      |    |                                              |           | F205 V155 / I      |
|                      |    |                                              |           | R209 H157 / N      |
|                      |    |                                              |           | Q211 N160 / D      |
|                      |    |                                              |           | G242 L170 / I / V  |
|                      |    |                                              |           | G244 V171 / I      |
|                      |    |                                              |           | Y247 T184 / A / S  |
|                      |    |                                              |           | A248 L187 / I      |
|                      |    |                                              |           | G251 V191 / I / L  |
|                      |    |                                              |           | G262 L198 / I      |
|                      |    |                                              |           | Y270 I210 / V      |
|                      |    |                                              |           | P307 W219 / Y / F  |
|                      |    |                                              |           | M221 / L / I       |
|                      |    |                                              |           | L227 / V / M       |
|                      |    |                                              |           | / I                |
|                      |    |                                              |           | D236 / N / E       |
|                      |    |                                              |           | L243 / V / I       |
|                      |    |                                              |           | F249 / L           |
|                      |    |                                              |           | <b>20:</b>         |
|                      |    |                                              |           | S39 / A / G        |
|                      |    |                                              |           | D47 / G            |
|                      |    |                                              |           | E94 / D / S / Q    |
|                      |    |                                              |           | G98 / D            |
|                      |    |                                              |           | C105 / S           |
|                      |    |                                              |           | E111 / D / H       |
|                      |    |                                              |           | D128 / E / S / Q   |
|                      |    |                                              |           | R152 / Q / N       |
|                      |    |                                              |           | L154 / V / I / F   |
|                      |    |                                              |           | A173 / G / S       |
|                      |    |                                              |           | D179 / K / E / S   |
|                      |    |                                              |           | E190 / S / Q / K   |
|                      |    |                                              |           | G225 / D           |
|                      |    |                                              |           | N241 / E / Q / D   |
|                      |    |                                              |           | P252 / A           |
|                      |    |                                              |           | E254 / S           |
|                      |    |                                              |           | D265 / S / N       |
|                      |    |                                              |           | E268 / K / D / S   |
|                      |    |                                              |           | A271 / G           |
|                      |    |                                              |           | D309 / E / S       |
| <b>λ-crystallins</b> | 19 | Minimum: 298<br>Maximum: 333<br>Average: 320 | 0.65±0.29 |                    |

|                      |   |                                              |           |                |              |                  |
|----------------------|---|----------------------------------------------|-----------|----------------|--------------|------------------|
|                      |   |                                              |           | I250 / M / L   |              |                  |
|                      |   |                                              |           | H257 / Y       |              |                  |
|                      |   |                                              |           | L258 / I       |              |                  |
|                      |   |                                              |           | N259 / D       |              |                  |
|                      |   |                                              |           | R269 / K       |              |                  |
|                      |   |                                              |           | D272 / Q / E   |              |                  |
|                      |   |                                              |           | V297 / I / L / |              |                  |
|                      |   |                                              |           | M              |              |                  |
|                      |   |                                              |           | L301 / M / I / |              |                  |
|                      |   |                                              |           | F              |              |                  |
|                      |   |                                              |           | R314 / K       |              |                  |
|                      |   |                                              |           | D319 / E       |              |                  |
|                      |   |                                              |           | L322 / M / V   |              |                  |
|                      |   |                                              |           | L325 / F       |              |                  |
|                      |   |                                              |           | L328 / F       |              |                  |
|                      |   |                                              |           |                |              |                  |
|                      |   |                                              |           | <b>72:</b>     |              |                  |
|                      |   |                                              |           | <b>46:</b>     |              |                  |
|                      |   |                                              |           | <b>27:</b>     |              |                  |
| <b>μ-crystallins</b> | 9 | Minimum: 250<br>Maximum: 312<br>Average: 287 | 0.72±0.27 | M64            | D71 / Q      | F81 / V          |
|                      |   |                                              |           | P65            | N72 / D / E  | K86 / T          |
|                      |   |                                              |           | Y67            | I74 / L      | P89 / S          |
|                      |   |                                              |           | S68            | L78 / M / I  | N102 / T / S     |
|                      |   |                                              |           | T76            | V79 / L      | V122 / A / T     |
|                      |   |                                              |           | K77            | T80 / S      | V124 / A / T     |
|                      |   |                                              |           | F82            | Q84 / K / N  | K159 / T / S     |
|                      |   |                                              |           | P83            | D87 / N S90  | S161 / Q / K     |
|                      |   |                                              |           | N85            | / T          | N164 / K / R     |
|                      |   |                                              |           | H91            | V96 / L      | S167 / N         |
|                      |   |                                              |           | A93            | V79 / L      | A177 / G         |
|                      |   |                                              |           | I95            | V97 / M      | G181 / N         |
|                      |   |                                              |           | F98            | V108 / I / L | A186 / V         |
|                      |   |                                              |           | G103           | M109 / I / L | E191 / K / S     |
|                      |   |                                              |           | D110           | S123 / T     | V203 / A         |
|                      |   |                                              |           | G111           | I140 / L     | K207 / S / D     |
|                      |   |                                              |           | V113           | L141 / I     | D214 / S / E     |
|                      |   |                                              |           | I114           | S143 / A     | R241 / N / H / Q |
|                      |   |                                              |           | T115           | L154 / F / I | S242 / Q / N     |
|                      |   |                                              |           | R118           | F158 / Y     | S243 / A / G     |
|                      |   |                                              |           | T119           | Q162 / K / E | E248 / D / K     |
|                      |   |                                              |           | A120           | V165 / I     | E259 / D / S     |
|                      |   |                                              |           | A121           | R168 / H / K | L260 / V / I / F |
|                      |   |                                              |           | A126           | L176 / F     | F268 / Y / H     |
|                      |   |                                              |           | T127           | E179 / D     | A269 / G         |
|                      |   |                                              |           | K128           | V194 / I     | G277 / N / D     |

---

|  |      |              |              |
|--|------|--------------|--------------|
|  | L130 | K195 / Q / R | K307 / D / N |
|  | P135 | D196 / N     |              |
|  | L138 | V199 / I     |              |
|  | A139 | V201 / I     |              |
|  | G142 | S206 / A     |              |
|  | G144 | V210 / L     |              |
|  | Q146 | A220 / T J   |              |
|  | A147 | Y246 / F     |              |
|  | R148 | A253 / S     |              |
|  | S149 | V267 / I     |              |
|  | H150 | I271 / L     |              |
|  | A153 | V274 / M     |              |
|  | F160 | I275 / V     |              |
|  | W166 | K285 / E     |              |
|  | A173 | M288 / V / I |              |
|  | A193 | / L          |              |
|  | A197 | M294 / V / L |              |
|  | D198 | I296 / V     |              |
|  | I200 | S301 / T / A |              |
|  | T202 | K303 / N     |              |
|  | T204 | L304 / I     |              |
|  | P209 | I309 / L     |              |
|  | L211 |              |              |
|  | W215 |              |              |
|  | V216 |              |              |
|  | K217 |              |              |
|  | G219 |              |              |
|  | H221 |              |              |
|  | I222 |              |              |
|  | N223 |              |              |
|  | S257 |              |              |
|  | G258 |              |              |
|  | A265 |              |              |
|  | E270 |              |              |
|  | G272 |              |              |
|  | E273 |              |              |
|  | T287 |              |              |
|  | F289 |              |              |
|  | S291 |              |              |
|  | L292 |              |              |
|  | G293 |              |              |
|  | A295 |              |              |

---

|  |  |  |  |             |              |            |  |
|--|--|--|--|-------------|--------------|------------|--|
|  |  |  |  | E297        |              |            |  |
|  |  |  |  | D298        |              |            |  |
|  |  |  |  | A302        |              |            |  |
|  |  |  |  | V305        |              |            |  |
|  |  |  |  | <b>274:</b> | <b>117:</b>  |            |  |
|  |  |  |  | P7          | I4 / M       |            |  |
|  |  |  |  | K9          | K14 / R      | <b>33:</b> |  |
|  |  |  |  | N10         | F15 / Y      | P5 / S     |  |
|  |  |  |  | P11         | K17 / Q      | P6 / T     |  |
|  |  |  |  | E12         | I18 / L      | T16 / K    |  |
|  |  |  |  | I13         | Q23 / E      | N29 / S    |  |
|  |  |  |  | F19         | Q24 / E      | S51 / D    |  |
|  |  |  |  | I20         | D26 / N      | C62 / A    |  |
|  |  |  |  | N21         | S27 / N      | R74 / N    |  |
|  |  |  |  | N22         | Y33 / F      | T106 / N   |  |
|  |  |  |  | V25         | V47 / I      | K111 / S   |  |
|  |  |  |  | A28         | A53 / T      | N139 / T   |  |
|  |  |  |  | G30         | I55 / V      | S148 / C   |  |
|  |  |  |  | K31         | K67 / P      | A176 / G   |  |
|  |  |  |  | T32         | T70 / S      | V204 / T   |  |
|  |  |  |  | P34         | H82 / R      | T222 / P   |  |
|  |  |  |  | V35         | R86 / K      | C224 / A   |  |
|  |  |  |  | I36         | F91 / I      | S230 / E   |  |
|  |  |  |  | N37         | H97 / Y      | G254 / A   |  |
|  |  |  |  | P38         | L98 / Y      | S266 / G   |  |
|  |  |  |  | T40         | S99 / A      | C269 / S   |  |
|  |  |  |  | K42         | T103 / S     | P275 / S   |  |
|  |  |  |  | K43         | N105 / D     | A286 / C   |  |
|  |  |  |  | I44         | Y110 / F     | A289 / G   |  |
|  |  |  |  | D46         | N112 / D     | G301 / A   |  |
|  |  |  |  | Q58         | Y114 / F     | S309 / D   |  |
|  |  |  |  | E49         | Q115 / N     | T323 / K   |  |
|  |  |  |  | G50         | Q123 / K     | E334 / R   |  |
|  |  |  |  | K52         | F128 / Y     | K354 / D   |  |
|  |  |  |  | D54         | A132 / T     | A356 / G   |  |
|  |  |  |  | D56         | Q138 / K     | C416 / A   |  |
|  |  |  |  | K57         | V142 / M     | N440 / S   |  |
|  |  |  |  | A58         | D145 / N     | A462 / C   |  |
|  |  |  |  | V59         | I155 / V     | S473 / G   |  |
|  |  |  |  | A61         | Y166 / F     | A480 / G   |  |
|  |  |  |  | K63         | M168 / L / I |            |  |
|  |  |  |  | A65         | V169 / L     |            |  |

**Ω-crystallins**

3

Minimum: 492

Maximum: 495

Average: 494

0.85±0.25

---

|      |          |
|------|----------|
| F66  | M171 / L |
| G69  | T172 / A |
| W72  | M175 / I |
| R73  | L179 / I |
| D76  | S180 / A |
| A77  | V185 / I |
| S78  | I187 / L |
| R80  | Y199 / H |
| G81  | S202 / A |
| L83  | V216 / M |
| L84  | V217 / I |
| L87  | S227 / A |
| A88  | I234 / V |
| D89  | N235 / D |
| L90  | S238 / A |
| E92  | K247 / Q |
| R93  | L248 / I |
| D94  | S256 / T |
| S100 | S262 / T |
| L101 | T277 / A |
| E102 | F281 / A |
| L104 | Q284 / E |
| G107 | E288 / N |
| K108 | S300 / A |
| P109 | A302 / S |
| S113 | H307 / Q |
| D117 | E312 / D |
| M118 | R317 / K |
| V119 | I327 / V |
| L125 | Y331 / F |
| R126 | E332 / D |
| Y127 | T335 / S |
| A129 | I341 / V |
| G130 | E343 / Q |
| W131 | Y346 / F |
| D133 | N347 / D |
| K134 | V349 / I |
| G135 | I350 / L |
| I140 | E358 / Q |
| P141 | K364 / E |
| D143 | N368 / K |
| G144 | K369 / R |

---

---

|      |          |
|------|----------|
| F146 | D372 / N |
| F147 | Y376 / F |
| T150 | I377 / V |
| K151 | E378 / Q |
| E153 | S386 / T |
| P154 | D387 / E |
| V155 | N388 / D |
| G156 | K390 / R |
| C158 | L403 / I |
| G159 | M404 / I |
| I161 | R407 / K |
| I162 | L409 / M |
| P163 | D410 / E |
| W164 | I413 / V |
| N165 | D414 / Q |
| P167 | Q418 / K |
| M170 | S419 / T |
| K174 | M423 / L |
| P177 | N430 / K |
| A178 | V432 / I |
| C181 | N433 / D |
| G182 | K434 / R |
| N183 | I435 / V |
| V186 | F438 / Y |
| K188 | T439 / S |
| P189 | N443 / K |
| A190 | T444 / A |
| E191 | T451 / S |
| Q192 | Y452 / F |
| T193 | H453 / N |
| P194 | Y467 / F |
| L195 | M476 / L |
| T196 | K478 / E |
| A197 | R482 / Q |
| L198 | E483 / Q |
| A201 | T485 / S |
| L203 | S489 / T |
| K205 | R493 / K |
| E206 |          |
| A207 |          |
| G208 |          |
| F209 |          |

---

---

P210  
P211  
G212  
V213  
V214  
N215  
P218  
G219  
Y220  
G221  
T223  
G225  
I228  
S229  
H233  
K236  
V237  
F239  
T240  
G241  
S242  
T243  
E244  
V245  
G246  
V249  
M250  
Q251  
A252  
A253  
N257  
L258  
K259  
R260  
L263  
E264  
L265  
G267  
K268  
P270  
V272  
V273

---

---

F274  
D276  
D278  
L279  
D280  
A282  
V283  
H287  
F291  
N293  
M294  
G295  
Q296  
C297  
R303  
T304  
Y305  
V306  
E308  
I310  
Y311  
F314  
K316  
V319  
E320  
A322  
R325  
G328  
D329  
P330  
F338  
P339  
Q340  
D342  
E344  
Q345  
K348  
I353  
S355  
Q359  
G360  
A361

---

---

K362

L363

G366

G367

H370

G371

G374

Y375

P379

T380

V381

F382

S383

V385

M389

I391

K393

E394

E395

I396

F397

G398

P399

V400

Q401

K405

F406

E411

V412

R415

N417

Y421

G422

A424

A425

A426

I427

T429

D431

M436

T437

V442

---

|               |    |                                              |           |           |             |                  |  |
|---------------|----|----------------------------------------------|-----------|-----------|-------------|------------------|--|
|               |    |                                              |           |           | G445        |                  |  |
|               |    |                                              |           |           | T446        |                  |  |
|               |    |                                              |           |           | V447        |                  |  |
|               |    |                                              |           |           | W448        |                  |  |
|               |    |                                              |           |           | V449        |                  |  |
|               |    |                                              |           |           | N450        |                  |  |
|               |    |                                              |           |           | P463        |                  |  |
|               |    |                                              |           |           | F464        |                  |  |
|               |    |                                              |           |           | G465        |                  |  |
|               |    |                                              |           |           | G466        |                  |  |
|               |    |                                              |           |           | K468        |                  |  |
|               |    |                                              |           |           | S470        |                  |  |
|               |    |                                              |           |           | G471        |                  |  |
|               |    |                                              |           |           | I472        |                  |  |
|               |    |                                              |           |           | R474        |                  |  |
|               |    |                                              |           |           | E475        |                  |  |
|               |    |                                              |           |           | L481        |                  |  |
|               |    |                                              |           |           | Y484        |                  |  |
|               |    |                                              |           |           | E486        |                  |  |
|               |    |                                              |           |           | V487        |                  |  |
|               |    |                                              |           |           | K488        |                  |  |
|               |    |                                              |           |           | I490        |                  |  |
|               |    |                                              |           |           | I491        |                  |  |
|               |    |                                              |           |           | P495        |                  |  |
|               |    |                                              |           |           | K497        |                  |  |
|               |    |                                              |           |           |             |                  |  |
| S-crystallins | 51 | Minimum: 182<br>Maximum: 318<br>Average: 220 | 0.75±0.25 | 1:<br>G96 | 4:          | 6:               |  |
|               |    |                                              |           |           |             | F17 / L / V      |  |
|               |    |                                              |           |           | Y16 / F     | P71 / A          |  |
|               |    |                                              |           |           | D45 / N / E | L73 / V / F / I  |  |
|               |    |                                              |           |           | E94 / Q / K | D84 / E / S      |  |
|               |    |                                              |           |           | D109 / E    | D117 / E / S     |  |
|               |    |                                              |           |           |             | M291 / I / L / V |  |
|               |    |                                              |           |           |             |                  |  |
| ζ-crystallins | 3  | Minimum: 105<br>Maximum: 323<br>Average: 239 | 0.64±0.20 | 34:       | 25:         | 9:               |  |
|               |    |                                              |           | V131      | I133 / V    | P154 / T         |  |
|               |    |                                              |           | L132      | K134 / Q    | P157 / T         |  |
|               |    |                                              |           | V133      | A138 / S    | G176 / N         |  |
|               |    |                                              |           | G139      | V140 / I    | K178 / T         |  |
|               |    |                                              |           | N141      | T145 / A    | G183 / N         |  |
|               |    |                                              |           | P142      | S149 / A    | S193 / T / N     |  |
|               |    |                                              |           | D144      | F152 / M    | K207 / S         |  |
|               |    |                                              |           | I147      | M164 / I    | S215 / N         |  |
|               |    |                                              |           | G150      | E172 / K    | A223 / G         |  |

---

|      |              |
|------|--------------|
| P159 | K181 / N     |
| G163 | T191 / A     |
| D165 | A199 / S     |
| A167 | Q200 / E     |
| G168 | Y201 / F     |
| V173 | A204 / T     |
| G174 | L224 / V / I |
| D184 | V226 / I     |
| R185 | T230 / S     |
| V186 | W232 / H     |
| Y187 | K233 / R     |
| G196 | A234 / S     |
| Y198 | L235 / I     |
| V203 | Y236 / F     |
| L212 | F237 / M     |
| L216 |              |
| T217 |              |
| F218 |              |
| Q220 |              |
| G221 |              |
| A222 |              |
| G225 |              |
| P227 |              |
| Y228 |              |
| Y229 |              |

---
